# Supplementary material for: Phylogeny and Evolutionary History of Respiratory Complex I Proteins in Melainabacteria
Source: MDPI journal article supplement (doi:10.3390/genes12060929), 2021-06-18
Supplement: s1 [file s1]

Tree scale: 1 
